# Supplementary material
Source: PubMed Central journal article supplement (PMC3003079)

# Supporting Information

Ki Yoon et al. 10.1073/pnas.1014593107

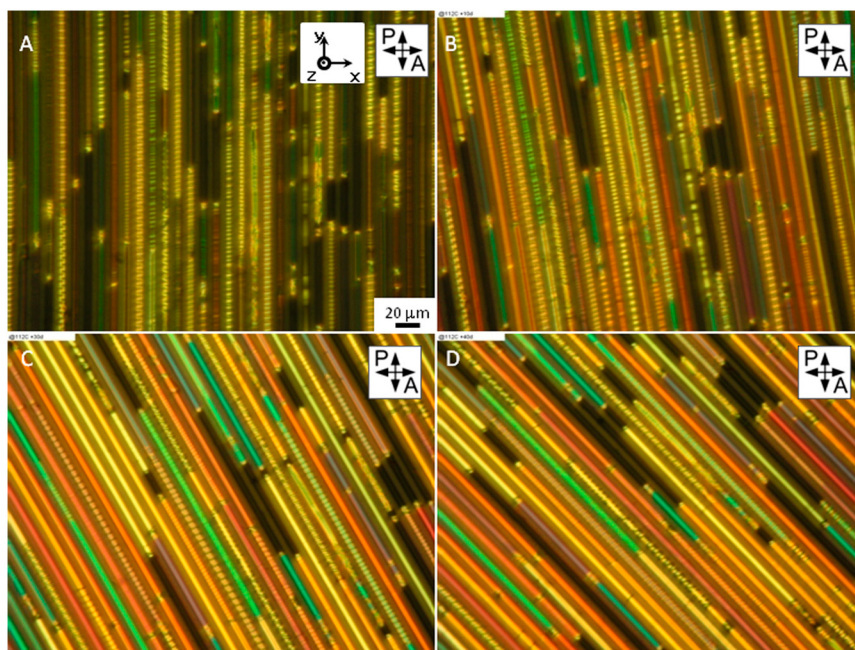

**Fig. S1.** Depolarized reflected light microscopic (DRLM) images of the channel confined B7 phase shows beautiful periodic optical textures over large areas. Rotating the sample through angles *A*, 0°, *B*, 10°, *C*, 30°, and *D*, 45° shows that the average optic axis is parallel to the channel for most to the geometries obtained.

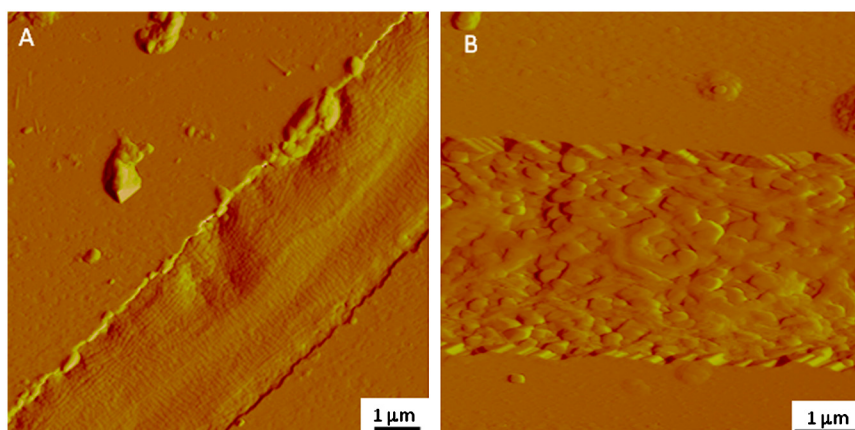

**Fig. S2.** (A) B4 phase of MHOBOW cooled down slowly to room temperature. (B) A crystallized 34-14O(OH)-4r sample in a channel shows no layer structure but lots of bumps.

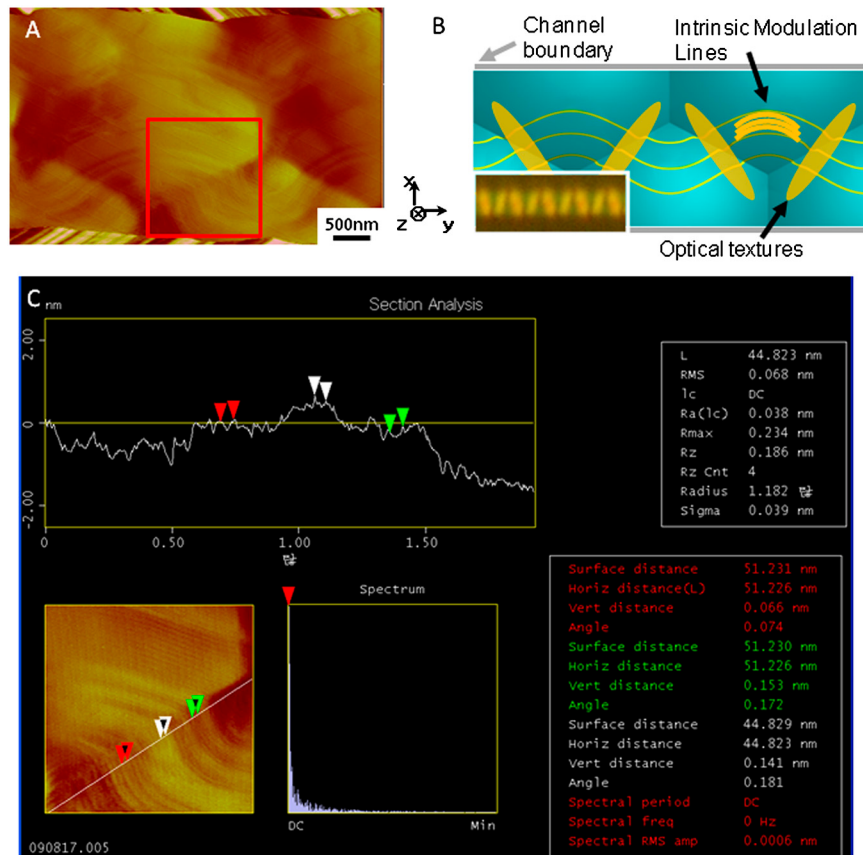

Supplement: 1014593107_pnas.1014593107_SI.pdf [file 1014593107_pnas.1014593107_SI.pdf]
